# Supplementary material for: Overview of the first HyMeX Special Observation Period over Croatia
Source: Copernicus journal article supplement (doi:10.5194/nhess-2016-247), 2016-08-15
Supplement: Supplementary file [file nhess-2016-247-AC2-supplement.pdf]

Reply to reviewer 2 comments on

**„Overview of the first HyMeX Special Observation Period over Croatia“**

by Ivančan-Picek, Tudor, Horvath, Stanešić and Ivatek-Šahdan

We appreciate the thorough review by the Reviewer and have done our best to improve the manuscript, according to the comments.

We agree with the reviewer that that the manuscript would be more readable if English language native speaker would proof-read the manuscript and correct the grammar. Before submitting a revised final version of our paper, English text will be corrected by a native English speaker.

We appreciate the comments made by the Reviewer, *„the paper lacks in clearly presenting the events making the readability quite low“*. In the revised manuscript we will remedy the problem. What we plan to do is to reorganise the text in accordance to the reviewer comments.

Regarding the Reviewer comment that the two sentences are the same as in Ferretti et al., 2014, we are very sorry for that and confirm that this is accidental. During our work on this manuscript we consulted a lot of relevant references (many are cited in the paper) in which we found similar sentences construction. The content of these two sentences is general description of the Mediterranean region and well known convection as major source of heavy precipitation over the sea, and therefore does not have any influence on the presented results. In the revised manuscript we will rewrite the mentioned sentences in our own words.

**General comments:**

Accepted. We appreciate the comments made by the Reviewer, which pointed that the description of the observations and models should be shortened. In the revised manuscript we will remedy the problem. What we plan to do is to remove unnecessary details and summarize details on observations and models in a separate table.

We agree with the Reviewer that the presentation of the events in the Section 3 is difficult to read. Before submitting a revised final version of our paper, this section will be rewritten in accordance to the reviewer comments.

### **Specific Comments:**

Line 40-42: Accepted. We will rewrite the sentence.

Line 98: To explain where is Adriatic TA we will refer to the HyMEX ([www.hymex.org/?page=target\\_areas](http://www.hymex.org/?page=target_areas)) where identified 3 main Mediterranean target areas: North-West (NW), Adriatic (A) and South-East (SE).

Line 138: Agreed. We will add a figure with the location of the observations in Croatia.

Line 226-231: Accepted. As we already noticed, Section 2 will be shortened.

Line 316: Accepted. We will add suggested references and remove details about the NAO.

Lines 351: Acknowledged. In the revised manuscript we will remedy the problem

Line 393: Agreed. Modified.

Line 464: Accepted. We will specify the IOPs.

Line 605: Accepted. The squares show the precipitation. We will prepare new Figure 11 where the squares should distinguish from the shaded background.

Line 640: We agree. The information about the data used in the data assimilation will be added.
