# Supplementary material for: Overview of the first HyMeX Special Observation Period over Croatia
Source: Copernicus journal article supplement (doi:10.5194/nhess-2016-247), 2016-08-15
Supplement: Supplementary file [file nhess-2016-247-RC2-supplement.pdf]

Title: Overview of the first HyMeX Special Observation Period over Croatia

Authors: Ivančan-Picek et al.

RECOMMENDATION: Major revisions

The authors present a review of the high impact events occurring in Croatia during SOP1 of the HyMeX campaign. In this paper an analysis of the main meteorological features of the events and the ability of the operational forecast are presented as well as the most important findings of the campaign.

Unfortunately, the paper lacks in clearly presenting the events making the readability quite low and referring to previous publications concerning the campaign in the introduction. Moreover, a proof-read by native English speaker would improve the readability of the paper.

Finally, plagiarism is not allowed, the two following sentences are the same as in Ferretti et al., 2014: *The characteristics of the Mediterranean region, a nearly closed basin surrounded by highly urbanized and complex terrain close to the coast, makes Mediterranean area prone to natural hazards related to the water cycle,....*

*Several events were characterised by convection over the sea followed by orographic precipitation.....*

My suggestion is to accept the paper for publication after a major revision.

#### General Comments:

Section 2 should be shortened (details on the observations and models can be summarized in a table).

The presentation of the events (section 3) is difficult to read. There is not correspondence between the figures presentation and their citation in the text. Moreover, the rationale with which the events are presented is not clear. This section should be rewritten and please show only the figure that are discussed in the text.

#### Specific Comments:

Pag. 2, line40-42: either rewrite the sentence or refer to Ferretti et al., 2014

Pag. 3 Line 98: ' Although the Adriatic TA... 'Where is it? Please add a figure showing the TAs

Pag. 4, line 138: ' DHMZ deployed a ground observation operational network... ' Please add a figure with the location of the observations (radar, soundings etc..) and special equipment if any.

Pag. 7, line 226-231 there is no need for a detailed description, refer to previous publications.

Pag. 10, line 316: previous paper have already assessed the role of Hurricane Nadine and NAO please add references (Pantillon et al., 2015, Ferretti et al., 2014).

Pag.10, line 351: figure 5 is called before then figure 4 (see general comments on this section)

Pag. 12, line 393: rewrite this sentence.

Pag. 14, line 464: '..... during the whole SOP1 period and during the specific days corresponding to 8 IOPs ...' Specify the IOPs.

Pag.18, line 605: Figure 11 is not clear, are the squares showing the precipitation in color? If yes it is difficult to distinguish from the shaded background.

Pag.19, line 640: data assimilation of which data? Please add a sentence.
